# Supplementary material
Source: PubMed Central journal article supplement (PMC3589816)
Supplement: NIHMS429212-supplement-Supplemental_Data.pdf [file NIHMS429212-supplement-Supplemental_Data.pdf]

**SUPPLEMENTAL MATERIAL.**

**Supplemental Table.** Cluster maxima showing the significant differences in resting-state functional connectivity between patients and healthy subjects.

| Time           | Brain region                          | BA                                    | Side | Peak MNI coordinates (mm) |     |     | Voxel count | Z-score | p-value |
|----------------|---------------------------------------|---------------------------------------|------|---------------------------|-----|-----|-------------|---------|---------|
|                |                                       |                                       |      | x                         | y   | z   |             |         |         |
| <b>Onset</b>   | <i>Patients &gt; healthy subjects</i> |                                       |      |                           |     |     |             |         |         |
|                | MFG                                   | 9, 45, 46                             | I    | -38                       | 48  | 18  | 251         | 4.3523  | 0.0000  |
|                | Thalamus                              |                                       | I    | -16                       | -18 | 10  | 111         | 4.3705  | 0.0000  |
|                | Cerebellum                            |                                       | I    | -36                       | -78 | -44 | 78          | 4.6893  | 0.0000  |
|                |                                       |                                       | I    | -18                       | -80 | -34 | 58          | 3.9953  | 0.0000  |
|                |                                       |                                       | C    | 18                        | -82 | -48 | 68          | 3.6710  | 0.0001  |
|                | <i>Patients &lt; healthy subjects</i> |                                       |      |                           |     |     |             |         |         |
|                | Occipital cortex                      | 27, 30, 37                            | C    | 10                        | -38 | -4  | 143         | 4.6346  | 0.0000  |
|                |                                       | 18, 19                                | I    | -34                       | -86 | 8   | 67          | 4.2580  | 0.0000  |
|                |                                       | 19, 37                                | I    | -30                       | -60 | -18 | 36          | 3.9377  | 0.0000  |
|                |                                       | 18                                    | I    | -24                       | -82 | -6  | 81          | 3.8865  | 0.0001  |
|                |                                       | 19                                    | C    | 28                        | -80 | 26  | 123         | 3.7013  | 0.0001  |
|                |                                       | 18                                    | C    | 22                        | -86 | -8  | 30          | 3.5099  | 0.0002  |
|                | PPC                                   | 7, 40                                 | C    | 28                        | -54 | 52  | 39          | 3.8708  | 0.0001  |
| SMC            | 3, 4                                  | I                                     | -52  | -12                       | 42  | 31  | 3.5819      | 0.0002  |         |
| <b>1 month</b> | <i>Patients &gt; healthy subjects</i> |                                       |      |                           |     |     |             |         |         |
|                | PPC                                   | 7, 39, 40                             | I    | -46                       | -56 | 38  | 316         | 4.6086  | 0.0000  |
|                |                                       | 39, 40, 48                            | C    | 56                        | -50 | 40  | 155         | 4.1949  | 0.0000  |
|                |                                       | 7, 40                                 | I    | -40                       | -62 | 56  | 62          | 3.7263  | 0.0001  |
|                | Cerebellum                            |                                       | I    | -38                       | -78 | -40 | 35          | 4.0493  | 0.0000  |
|                |                                       |                                       | C    | 44                        | -70 | -36 | 41          | 3.6536  | 0.0001  |
|                | <i>Patients &lt; healthy subjects</i> |                                       |      |                           |     |     |             |         |         |
|                | Occipital cortex                      | 19, 37                                | C    | 22                        | -52 | 4   | 88          | 4.4688  | 0.0000  |
|                |                                       | 27, 30, 37                            | C    | 12                        | -36 | -2  | 99          | 4.3705  | 0.0000  |
|                |                                       | 18, 19                                | C    | 36                        | -86 | 16  | 63          | 4.1732  | 0.0000  |
|                |                                       | 19                                    | C    | 18                        | -86 | 46  | 43          | 3.8681  | 0.0001  |
|                |                                       | 7, 19                                 | C    | 26                        | -74 | 42  | 30          | 3.7282  | 0.0001  |
|                | SMC                                   | 3, 4, 48                              | C    | 52                        | -20 | 34  | 70          | 4.2323  | 0.0000  |
|                | PPC                                   | 2, 3, 40                              | C    | 30                        | -42 | 52  | 60          | 3.8407  | 0.0001  |
|                | MFG                                   | 11, 38, 48                            | C    | 24                        | 20  | -20 | 58          | 4.6086  | 0.0000  |
|                |                                       | 10                                    | I    | -8                        | 64  | 4   | 33          | 3.7786  | 0.0001  |
|                |                                       | 10, 11                                | I    | -8                        | 50  | -14 | 57          | 3.6305  | 0.0001  |
|                | <b>3 months</b>                       | <i>Patients &gt; healthy subjects</i> |      |                           |     |     |             |         |         |
| Cerebellum     |                                       |                                       | C    | 26                        | -58 | -54 | 40          | 4.2989  | 0.0000  |
|                |                                       |                                       | C    | 20                        | -48 | -40 | 48          | 4.2593  | 0.0000  |
|                |                                       |                                       | I    | -34                       | -78 | -40 | 39          | 4.1426  | 0.0000  |
|                |                                       |                                       | C    | 16                        | -80 | -50 | 60          | 4.1243  | 0.0000  |

## SUPPLEMENTAL MATERIAL.

|                 |                                       |            |   |     |     |     |     |        |        |
|-----------------|---------------------------------------|------------|---|-----|-----|-----|-----|--------|--------|
|                 |                                       |            | I | -20 | -34 | -48 | 77  | 4.0609 | 0.0000 |
|                 |                                       |            | I | -42 | -54 | -52 | 29  | 3.7547 | 0.0001 |
|                 | MFG                                   | 9, 46      | I | -38 | 38  | 36  | 35  | 3.5571 | 0.0002 |
|                 | Thalamus                              |            | C | 18  | -18 | 8   | 33  | 4.3602 | 0.0000 |
|                 | Temporal cortex                       | 37, 39     | I | -52 | -64 | 16  | 26  | 3.7334 | 0.0001 |
|                 | <i>Patients &lt; healthy subjects</i> |            |   |     |     |     |     |        |        |
|                 | SMC                                   | 3          | C | 42  | -30 | 60  | 27  | 3.7876 | 0.0001 |
| <b>6 months</b> | <i>Patients &gt; healthy subjects</i> |            |   |     |     |     |     |        |        |
|                 | Cerebellum                            |            | I | -36 | -78 | -40 | 101 | 4.2081 | 0.0000 |
|                 |                                       |            | I | -2  | -72 | -10 | 33  | 3.9546 | 0.0000 |
|                 |                                       |            | I | -28 | -52 | -42 | 26  | 3.7464 | 0.0001 |
|                 | PPC                                   | 22, 40, 48 | I | -66 | -40 | 22  | 74  | 4.1617 | 0.0000 |
|                 | <i>Patients &lt; healthy subjects</i> |            |   |     |     |     |     |        |        |
|                 | MFG                                   | 10, 11     | I | -10 | 50  | -14 | 474 | 4.7508 | 0.0000 |
|                 |                                       | 11, 38, 48 | C | 22  | 18  | -20 | 37  | 4.3602 | 0.0000 |
|                 | SMC                                   | 2, 3, 4    | C | 48  | -20 | 46  | 189 | 4.3543 | 0.0000 |
|                 |                                       | 6, 43, 48  | C | 50  | -2  | 20  | 39  | 4.1862 | 0.0000 |
|                 |                                       | 4, 6       | I | -50 | -2  | 36  | 37  | 3.8871 | 0.0001 |
|                 | Occipital cortex                      | 18, 19     | C | 18  | -90 | 26  | 178 | 4.5855 | 0.0000 |
|                 |                                       | 18, 19     | C | 36  | -88 | 12  | 37  | 4.0220 | 0.0000 |
|                 | PPC                                   | 5, 7, 40   | C | 22  | -58 | 50  | 160 | 3.6941 | 0.0001 |

BA, Brodmann's area; MNI, Montreal Neurological Institute; MFG, Middle frontal gyrus;

PPC, Posterior parietal cortex; SMC: sensorimotor cortex; I, Ipsilesional; C, Contralesional
